# Supplementary material
Source: PubMed Central journal article supplement (PMC2933064)
Supplement: NIHMS216895-supplement-Supp_Fig_S1___Table_S1-S3.pdf [file NIHMS216895-supplement-Supp_Fig_S1___Table_S1-S3.pdf]

## Supplementary Material

### **FoldGPCR: structure prediction protocol for the transmembrane domain of G protein-coupled receptors from class A**

Mayako Michino, Jianhan Chen, Raymond C. Stevens, and Charles L. Brooks III<sup>‡</sup>

#### **Predicted models for GPCRs from $\beta$ -, $\gamma$ -, and $\delta$ -groups of class A**

We applied the foldGPCR protocol to predict the structures of several GPCRs for which the experimental structure is not known. Since all known GPCR structures are from the  $\alpha$ -group of class A, we chose to generate predicted models for receptors belonging to the  $\beta$ -,  $\gamma$ -, and  $\delta$ -groups that are phylogenetically more distant and perhaps also structurally more divergent from the templates than any receptors in the  $\alpha$ -group:<sup>3</sup> human vasopressin V1a receptor (Swiss-Prot ID: P37288), human  $\kappa$ -type opioid receptor (Swiss-Prot ID: P41145), and human proton-sensing receptor GPR4 (Swiss-Prot ID: P46093). Of the available GPCR crystal structures, the closest sequence homolog to the target receptor was selected as the template structure for obtaining the interhelical contact restraints and the topological restraints; the bovine rhodopsin structure (PDB ID: 1U19) was used for the proton-sensing receptor (47 predicted conserved contacts), and the human  $\beta_2$ AR (PDB ID: 2RH1) was used for the vasopressin (55 predicted conserved contacts) and opioid (60 predicted conserved contacts) receptors. The receptors are modeled without bound ligands, but the predicted models are expected to be in the antagonist-bound conformations.

---

<sup>‡</sup> Corresponding author. Email: brookscl@umich.edu; Phone: 734/647-6682; FAX: 734/647-1604.

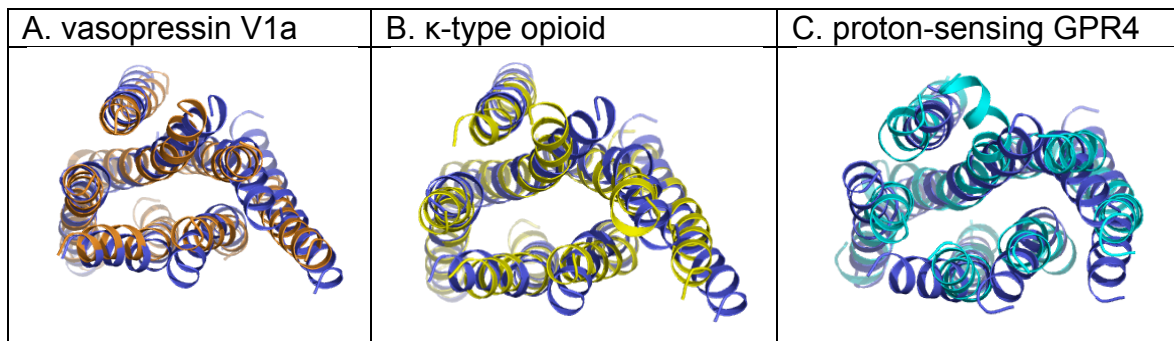

**Supplementary Figure 1.** Superposition of the predicted models of human vasopressin V1a (orange),  $\kappa$ -type opioid (yellow), and proton-sensing GPR4 (cyan) receptors to their respective templates (blue). The models shown are the average structures of the entire refined ensembles. The vasopressin V1a and  $\kappa$ -type opioid receptor models are 3.4 and 2.6 Å C $\alpha$  RMSD from the  $\beta_2$ AR template, respectively; the proton-sensing GPR4 receptor model is 3.6 Å C $\alpha$  RMSD from the rhodopsin template.

**Supplementary Table I.** List of predicted conserved contacts used to generate the  $\beta_2$ AR models. Residue pair (i,j) predicted to form a contact in  $\beta_2$ AR aligns with contact-forming residue pair (i',j') in rhodopsin.

| i   | j   | i'  | j'  |
|-----|-----|-----|-----|
| 51  | 76  | 55  | 80  |
| 51  | 79  | 55  | 83  |
| 51  | 80  | 55  | 84  |
| 51  | 323 | 55  | 303 |
| 67  | 130 | 71  | 134 |
| 69  | 326 | 73  | 306 |
| 71  | 127 | 75  | 131 |
| 71  | 154 | 75  | 157 |
| 72  | 322 | 76  | 302 |
| 72  | 326 | 76  | 306 |
| 74  | 123 | 78  | 127 |
| 74  | 154 | 78  | 157 |
| 74  | 157 | 78  | 160 |
| 74  | 158 | 78  | 161 |
| 75  | 123 | 79  | 127 |
| 75  | 278 | 79  | 257 |
| 79  | 319 | 83  | 299 |
| 79  | 323 | 83  | 303 |
| 121 | 211 | 125 | 215 |
| 121 | 282 | 125 | 261 |
| 122 | 211 | 126 | 215 |
| 124 | 215 | 128 | 219 |
| 124 | 282 | 128 | 261 |
| 125 | 211 | 129 | 215 |
| 125 | 214 | 129 | 218 |
| 125 | 215 | 129 | 219 |
| 126 | 153 | 130 | 156 |
| 126 | 156 | 130 | 159 |
| 128 | 215 | 132 | 219 |
| 128 | 218 | 132 | 222 |
| 129 | 214 | 133 | 218 |
| 132 | 218 | 136 | 222 |
| 132 | 221 | 136 | 225 |
| 163 | 207 | 166 | 211 |
| 204 | 290 | 208 | 269 |
| 208 | 287 | 212 | 266 |
| 212 | 283 | 216 | 262 |
| 216 | 283 | 220 | 262 |
| 281 | 321 | 260 | 301 |
| 281 | 325 | 260 | 305 |
| 282 | 321 | 261 | 301 |
| 285 | 317 | 264 | 297 |
| 285 | 318 | 264 | 298 |
| 285 | 321 | 264 | 301 |
| 286 | 318 | 265 | 298 |

**Supplementary Table II.** List of predicted conserved contacts used to generate the A<sub>2A</sub> models. Residue pair (i,j) predicted to form a contact in A<sub>2A</sub> aligns with contact-forming residue pair (i',j') in β<sub>2</sub>AR.

| i   | j   | i'  | j'  |
|-----|-----|-----|-----|
| 24  | 49  | 51  | 76  |
| 24  | 52  | 51  | 79  |
| 24  | 285 | 51  | 323 |
| 27  | 45  | 54  | 72  |
| 27  | 49  | 54  | 76  |
| 27  | 285 | 54  | 323 |
| 40  | 101 | 67  | 130 |
| 41  | 101 | 68  | 130 |
| 41  | 102 | 68  | 131 |
| 41  | 235 | 68  | 275 |
| 43  | 118 | 70  | 147 |
| 43  | 122 | 70  | 151 |
| 43  | 125 | 70  | 154 |
| 44  | 94  | 71  | 123 |
| 44  | 97  | 71  | 126 |
| 44  | 98  | 71  | 127 |
| 44  | 101 | 71  | 130 |
| 44  | 125 | 71  | 154 |
| 47  | 94  | 74  | 123 |
| 47  | 125 | 74  | 154 |
| 47  | 129 | 74  | 158 |
| 48  | 95  | 75  | 124 |
| 48  | 238 | 75  | 278 |
| 48  | 284 | 75  | 322 |
| 48  | 288 | 75  | 326 |
| 52  | 284 | 79  | 322 |
| 92  | 242 | 121 | 282 |
| 95  | 193 | 124 | 215 |
| 95  | 239 | 124 | 279 |
| 95  | 242 | 124 | 282 |
| 96  | 193 | 125 | 215 |
| 98  | 239 | 127 | 279 |
| 99  | 193 | 128 | 215 |
| 99  | 239 | 128 | 279 |
| 100 | 196 | 129 | 218 |
| 102 | 197 | 131 | 219 |
| 103 | 196 | 132 | 218 |
| 103 | 199 | 132 | 221 |
| 103 | 200 | 132 | 222 |
| 186 | 242 | 208 | 282 |
| 187 | 247 | 209 | 287 |
| 190 | 243 | 212 | 283 |
| 190 | 247 | 212 | 287 |
| 193 | 239 | 215 | 279 |
| 193 | 243 | 215 | 283 |
| 197 | 239 | 219 | 279 |
| 241 | 280 | 281 | 318 |
| 241 | 283 | 281 | 321 |

|     |     |     |     |
|-----|-----|-----|-----|
| 241 | 287 | 281 | 325 |
| 242 | 280 | 282 | 318 |
| 245 | 280 | 285 | 318 |
| 245 | 283 | 285 | 321 |

**Supplementary Table III.** Distance measurements (Å) for the topological distance restraints obtained from the rhodopsin,  $\beta_2$ AR, and  $A_{2A}$  structures (PDB ID codes 1U19 for rhodopsin; 2RH1 for  $\beta_2$ AR; 3EML for  $A_{2A}$ ).

**A. Extracellular side of the helical bundle**

| Rhodopsin         |          | $\beta_2$ AR      |          | $A_{2A}$          |          |
|-------------------|----------|-------------------|----------|-------------------|----------|
| Residues          | Distance | Residues          | Distance | Residues          | Distance |
| 38:41 – 93:96     | 10.4     | 34:37 – 89:92     | 12.4     | 7:10 - 62:65      | 12.2     |
| 38:41 – 288:291   | 13.6     | 34:37 – 308:311   | 18.2     | 7:10 - 270:273    | 12.8     |
| 93:96 – 288:291   | 16.3     | 89:92 – 308:311   | 14.1     | 62:65 - 270:273   | 14.0     |
| 93:96 – 110:113   | 10.0     | 89:92 – 106:109   | 12.5     | 62:65 - 77:80     | 10.8     |
| 110:113 – 288:291 | 17.2     | 106:109 – 308:311 | 19.3     | 77:80 - 270:273   | 19.9     |
| 110:113 – 271:274 | 20.3     | 106:109 – 292:295 | 22.5     | 77:80 - 252:255   | 21.5     |
| 271:274 – 288:291 | 11.3     | 292:295 – 308:311 | 12.3     | 252:255 - 270:273 | 12.8     |
| 202:205 – 271:274 | 13.3     | 198:201 – 292:295 | 10.4     | 176:179 - 252:255 | 10.5     |
| 110:113 – 202:205 | 19.6     | 106:109 – 198:201 | 19.3     | 77:80 - 176:179   | 17.2     |
| 110:113 – 170:173 | 11.9     | 106:109 – 167:170 | 11.0     | 77:80 - 138:141   | 10.2     |
| 170:173 – 202:205 | 13.0     | 167:170 – 198:201 | 13.5     | 138:141 - 176:179 | 13.1     |
| 170:173 – 271:274 | 20.9     | 167:170 – 292:295 | 20.8     | 138:141 - 252:255 | 21.3     |

**B. Center of the helical bundle**

| Rhodopsin         |          | $\beta_2$ AR      |          | $A_{2A}$          |          |
|-------------------|----------|-------------------|----------|-------------------|----------|
| Residues          | Distance | Residues          | Distance | Residues          | Distance |
| 48:51 – 261:264   | 19.5     | 44:47 – 282:285   | 18.6     | 17:20 - 242:245   | 18.0     |
| 48:51 – 297:300   | 9.9      | 44:47 – 317:320   | 9.0      | 17:20 - 279:282   | 8.8      |
| 261:264 – 297:300 | 10.8     | 282:285 – 317:320 | 10.5     | 242:245 - 279:282 | 10.1     |
| 48:51 – 82:85     | 11.6     | 44:47 – 78:81     | 11.0     | 17:20 - 51:54     | 10.0     |
| 82:85 – 297:300   | 9.9      | 78:81 – 317:320   | 10.1     | 51:54 - 279:282   | 10.1     |
| 82:85 – 120:123   | 9.8      | 78:81 – 116:119   | 9.5      | 51:54 - 87:90     | 9.9      |
| 120:123 – 297:300 | 10.8     | 116:119 – 317:320 | 13.2     | 87:90 - 279:282   | 13.5     |
| 120:123 – 261:264 | 12.6     | 116:119 – 282:285 | 13.5     | 87:90 - 242:245   | 13.8     |
| 82:85 – 161:164   | 14.4     | 78:81 – 158:161   | 14.7     | 51:54 - 129:132   | 14.9     |
| 120:123 – 161:164 | 9.1      | 116:119 – 158:161 | 9.3      | 87:90 - 129:132   | 8.9      |
| 161:164 – 213:216 | 14.8     | 158:161 – 209:212 | 15.2     | 129:132 - 187:190 | 17.0     |
| 120:123 – 213:216 | 14.1     | 116:119 – 209:212 | 12.3     | 87:90 - 187:190   | 13.5     |
| 213:216 – 261:264 | 14.1     | 209:212 – 282:285 | 12.7     | 187:190 - 242:245 | 12.3     |
| 161:164 – 261:264 | 19.7     | 158:161 – 282:285 | 21.2     | 129:132 - 242:245 | 21.3     |

**C. Cytoplasmic side of the helical bundle**

| Rhodopsin         |          | $\beta_2$ AR      |          | $A_{2A}$          |          |
|-------------------|----------|-------------------|----------|-------------------|----------|
| Residues          | Distance | Residues          | Distance | Residues          | Distance |
| 57:60 – 303:306   | 12.0     | 53:56 – 323:326   | 11.5     | 26:29 - 285:288   | 11.4     |
| 57:60 – 154:157   | 19.0     | 53:56 – 151:154   | 19.1     | 26:29 - 122:125   | 19.7     |
| 57:60 – 74:77     | 10.9     | 53:56 – 70:73     | 10.7     | 26:29 - 43:46     | 10.8     |
| 74:77 – 154:157   | 9.9      | 70:73 – 151:154   | 10.5     | 43:46 - 122:125   | 10.9     |
| 74:77 – 303:306   | 11.9     | 70:73 – 323:326   | 13.7     | 43:46 - 285:288   | 14.0     |
| 254:257 – 303:306 | 10.7     | 275:278 – 323:326 | 10.4     | 235:238 - 285:288 | 10.8     |

|                   |      |                   |      |                   |      |
|-------------------|------|-------------------|------|-------------------|------|
| 74:77 – 254:257   | 14.4 | 70:73 – 275:278   | 13.9 | 43:46 - 235:238   | 14.1 |
| 74:77 – 130:133   | 12.6 | 70:73 – 126:129   | 11.7 | 43:46 - 97:100    | 11.1 |
| 130:133 – 154:157 | 11.4 | 126:129 – 151:154 | 12.9 | 97:100 - 122:125  | 13.1 |
| 130:133 – 254:257 | 11.3 | 126:129 – 275:278 | 11.9 | 97:100 - 235:238  | 11.4 |
| 154:157 – 221:224 | 21.4 | 151:154 – 217:220 | 21.7 | 122:125 - 195:198 | 22.8 |
| 130:133 – 221:224 | 10.9 | 126:129 – 217:220 | 9.7  | 97:100 - 195:198  | 10.7 |
| 221:224 – 254:257 | 13.2 | 217:220 – 275:278 | 12.2 | 195:198 - 235:238 | 11.9 |
| 154:157 – 254:257 | 19.2 | 151:154 – 275:278 | 21.1 | 122:125 - 235:238 | 21.5 |
